# Supplementary material for: Recognition of HER2 expression in hepatocellular carcinoma and its significance in postoperative tumor recurrence
Source: PubMed Central journal article supplement (PMC6434216; doi:10.1002/cam4.2006), 2019-02-04

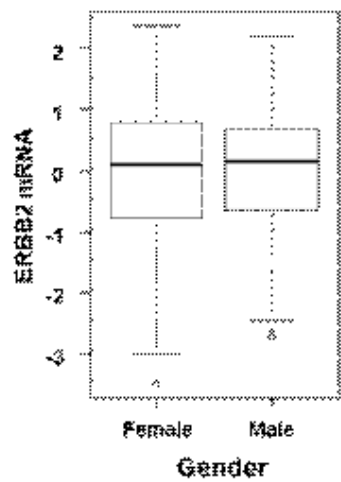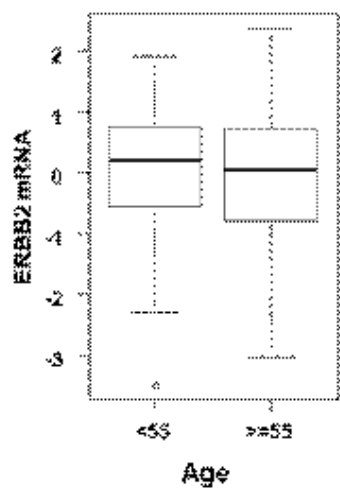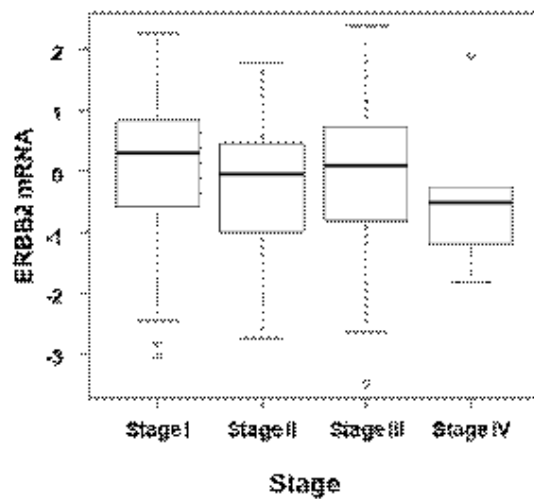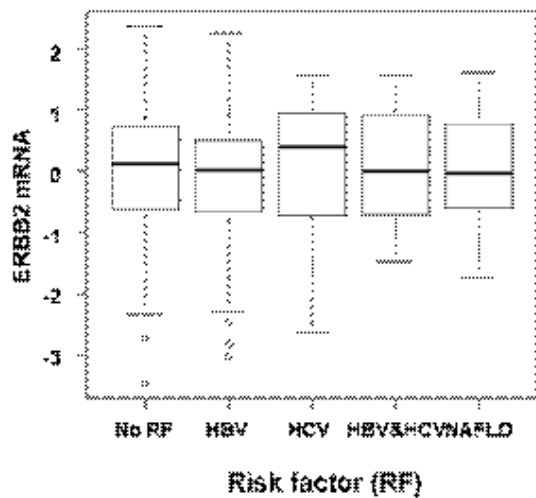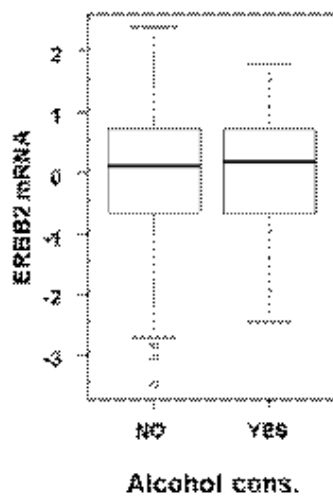

Supplement: CAM4-8-1269-s001.pdf [file CAM4-8-1269-s001.pdf]
