# Supplementary material for: Recognition of HER2 expression in hepatocellular carcinoma and its significance in postoperative tumor recurrence
Source: PubMed Central journal article supplement (PMC6434216; doi:10.1002/cam4.2006), 2019-02-04
Supplement: CAM4-8-1269-s002.pdf [file CAM4-8-1269-s002.pdf]

# Evolution of HCC

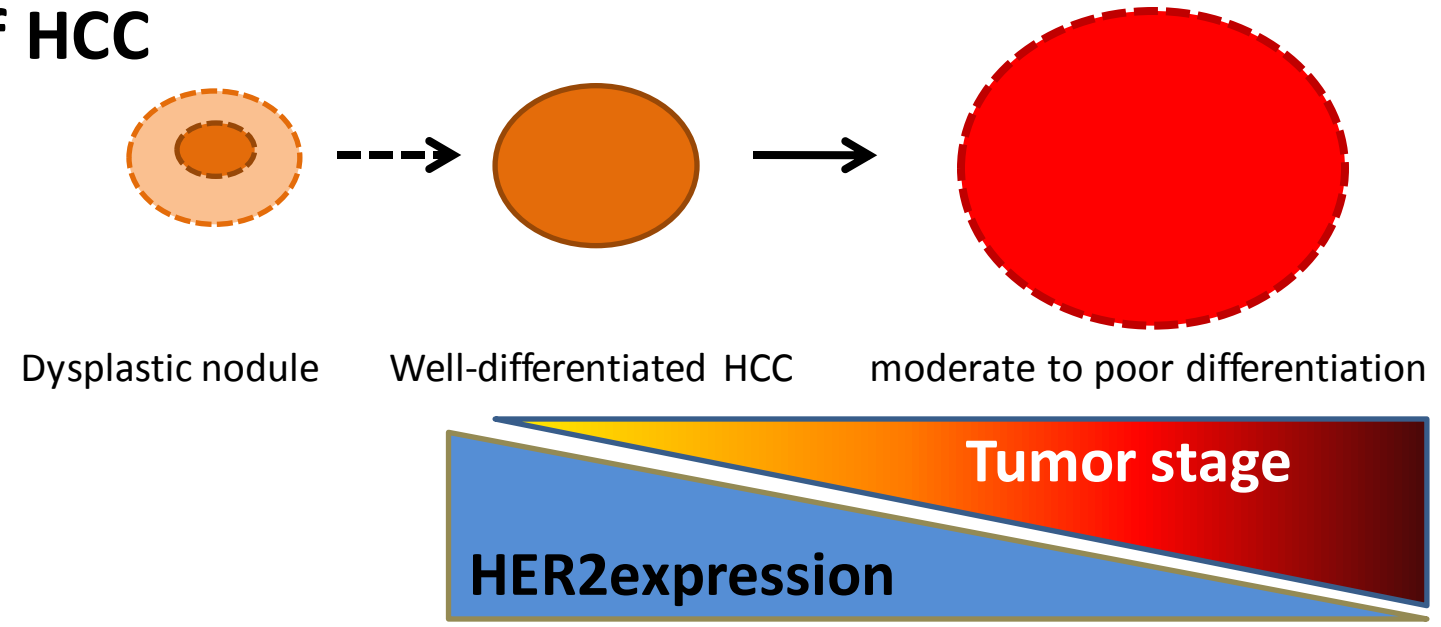

# HER2 inhibition treatment

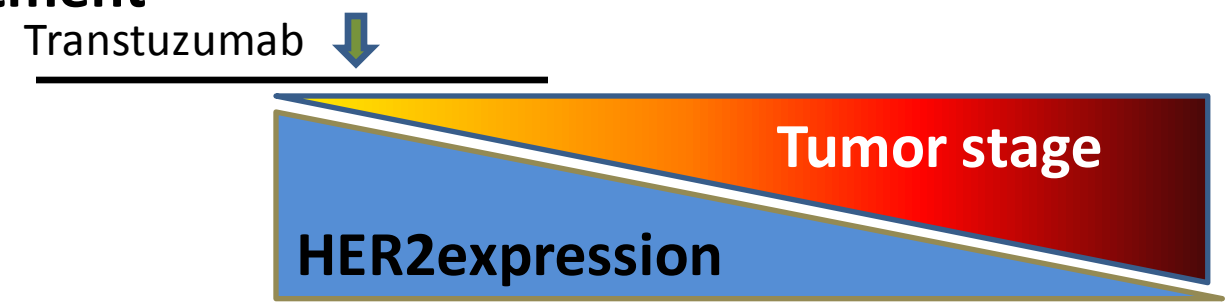

**1. *In vitro* HER2 inhibition**  
with Transtuzumab in HER2-positive HCC cells (Figure 3,4)

| Cell survival | Cell proliferation | EMT |
|---------------|--------------------|-----|
| -             | ↓ (10-20%)         | ↓↓↓ |

**2. *In vivo* HER2 inhibition**  
with Transtuzumab in intrahepatic tumor in rats (Table S3)

| Tumor size | Metastasis |
|------------|------------|
| ↓↓ (40%)   | ↓↓↓ (60%)  |
